# Supplementary material for: Sex Differentiation from Human Scent Chemical Analysis
Source: MDPI journal article supplement (doi:10.3390/separations10050293), 2023-05-05

**Box charts for significant compounds mentioned for the classifiers.**

**Unsaturated acids**

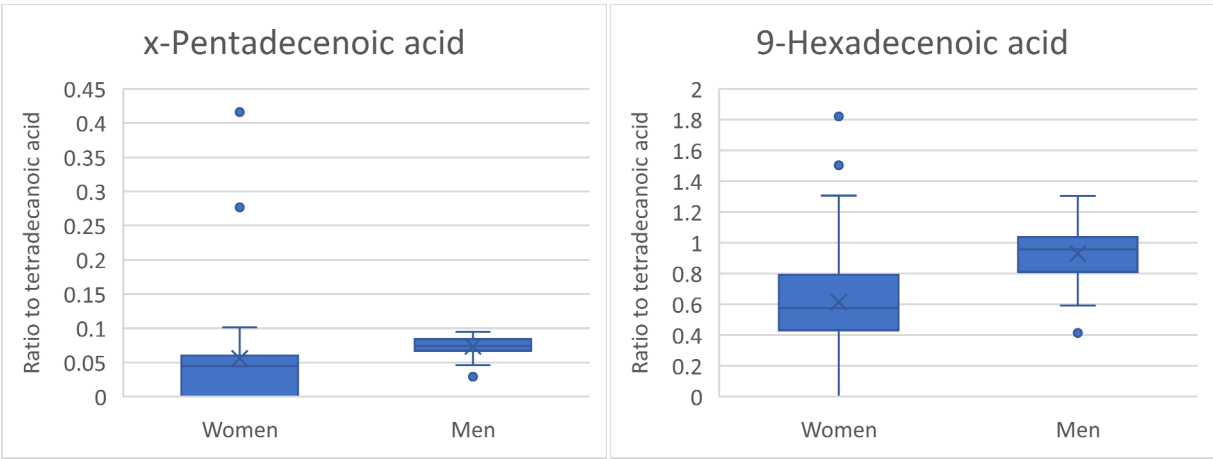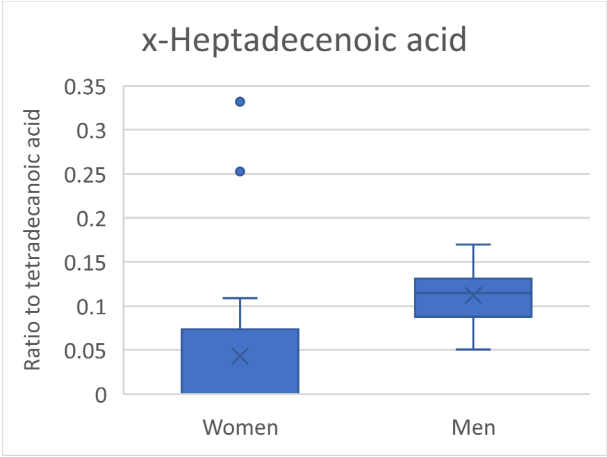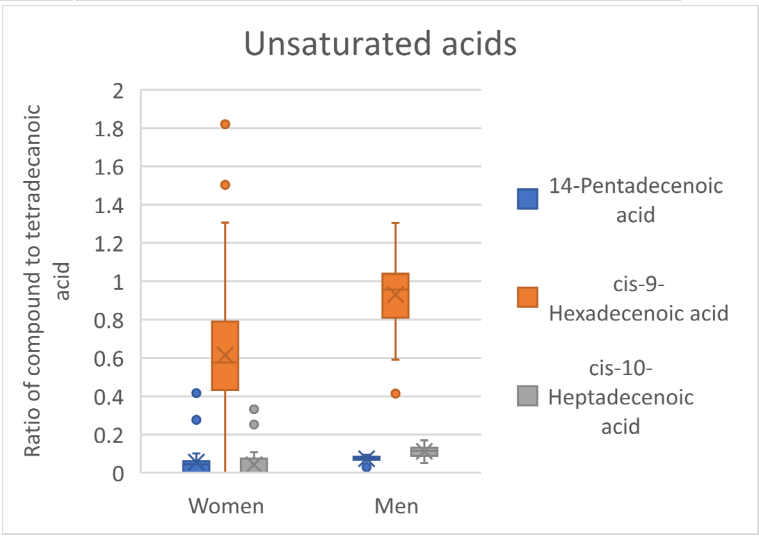

**Saturated acids**

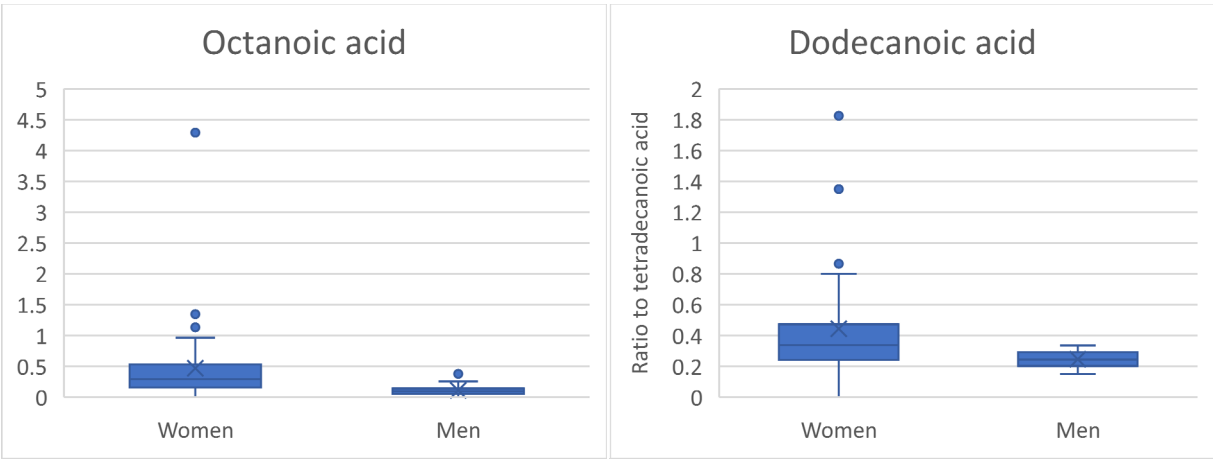

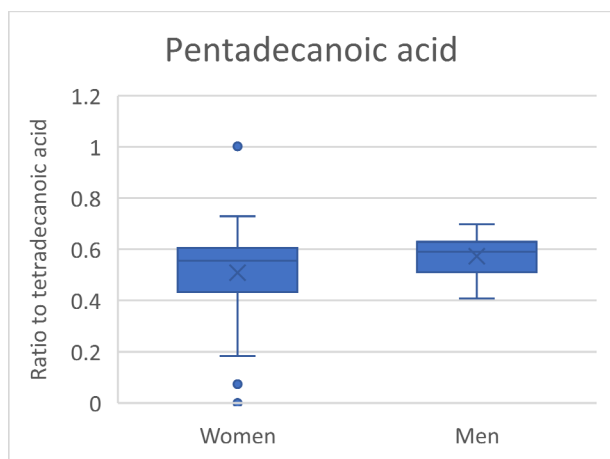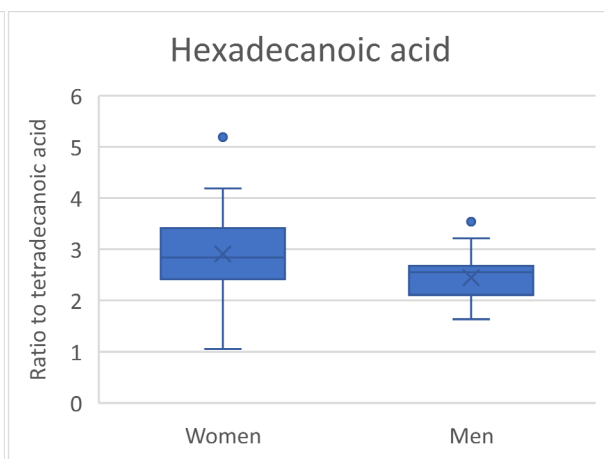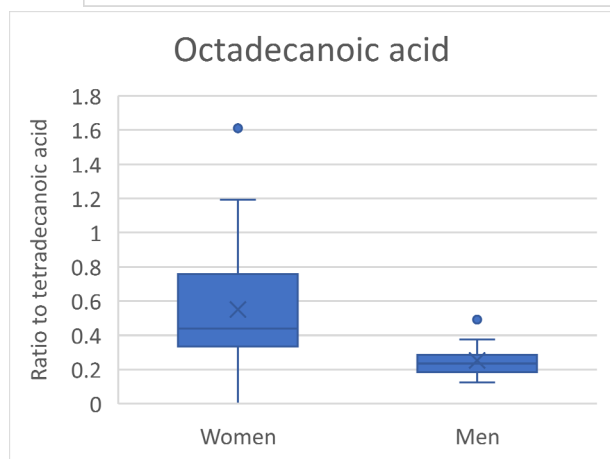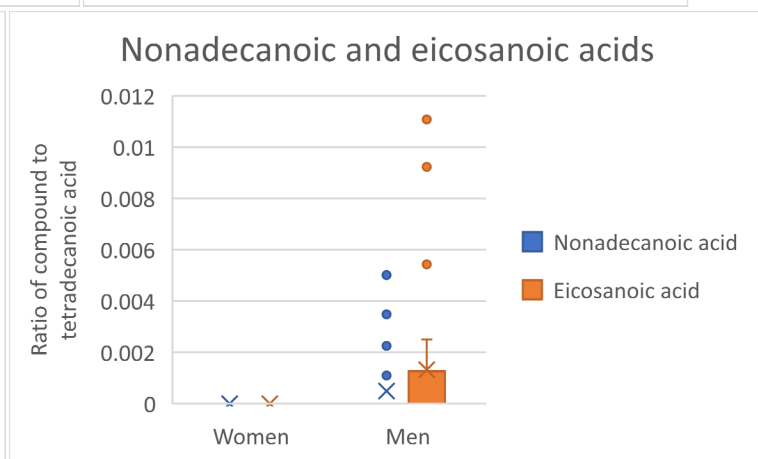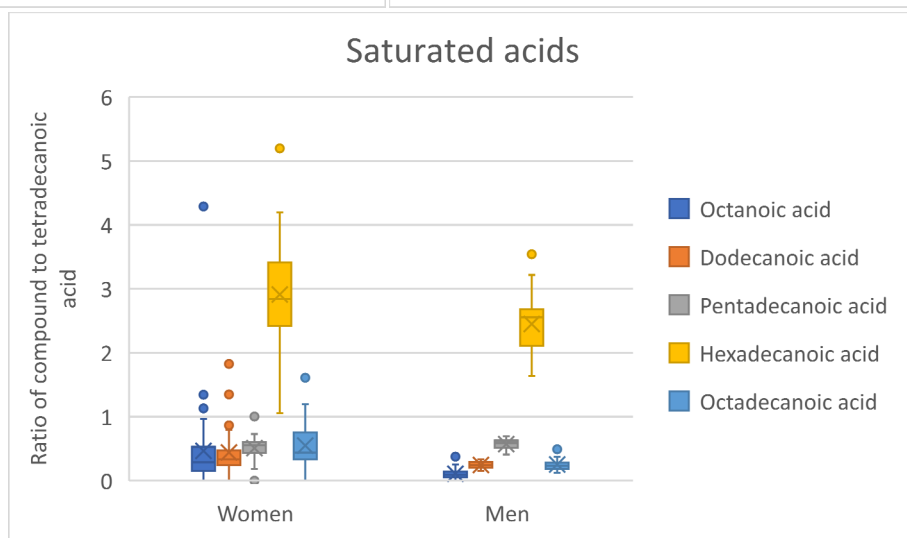

## Hydrocarbons

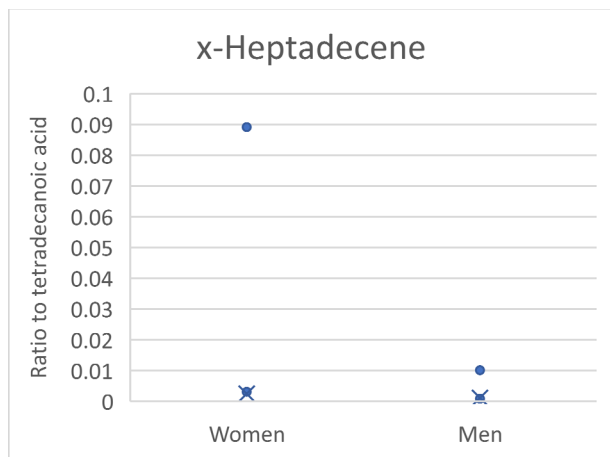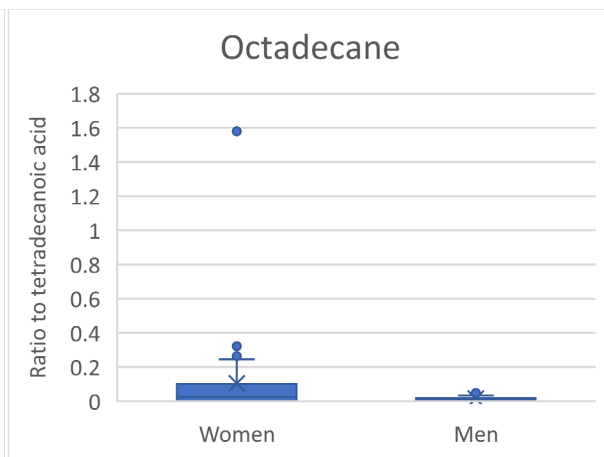

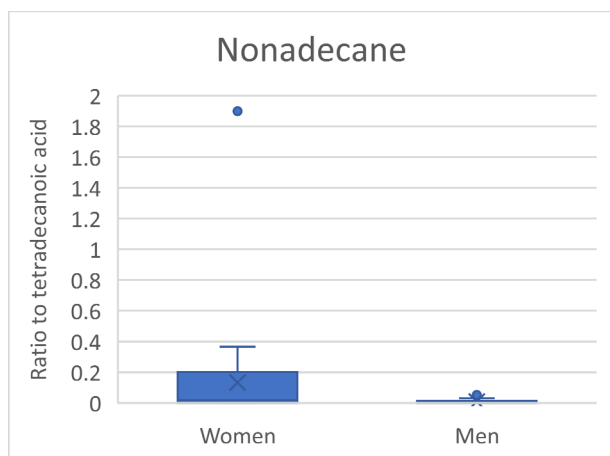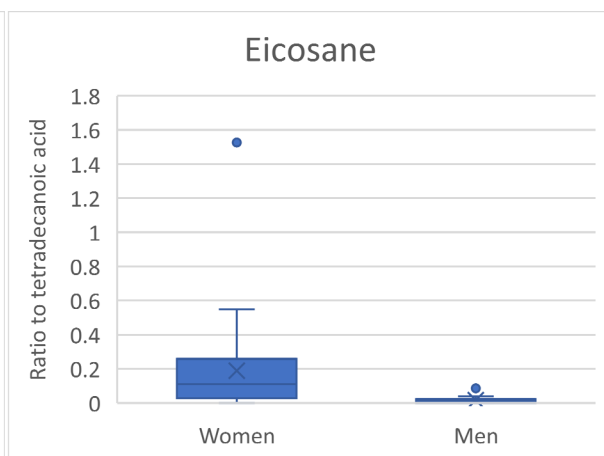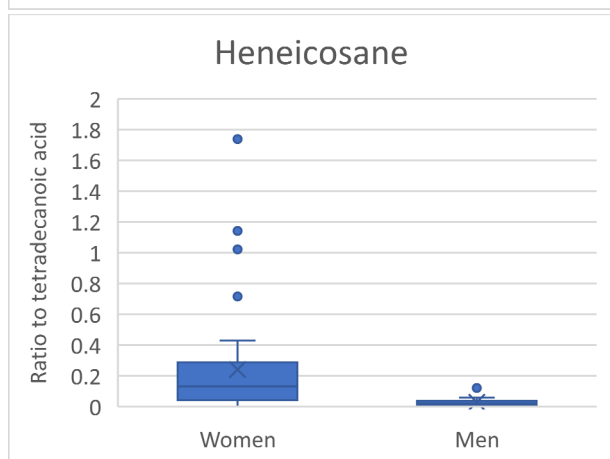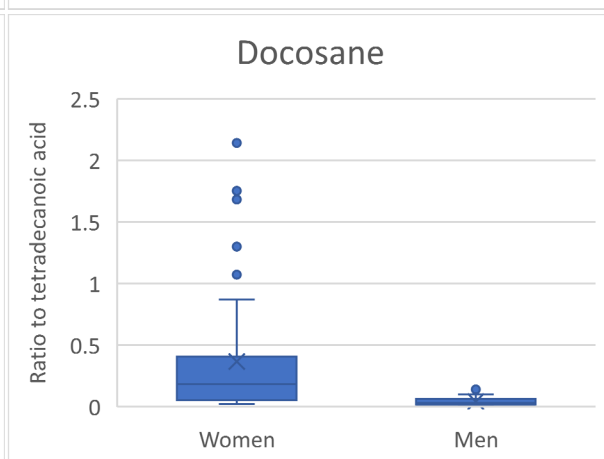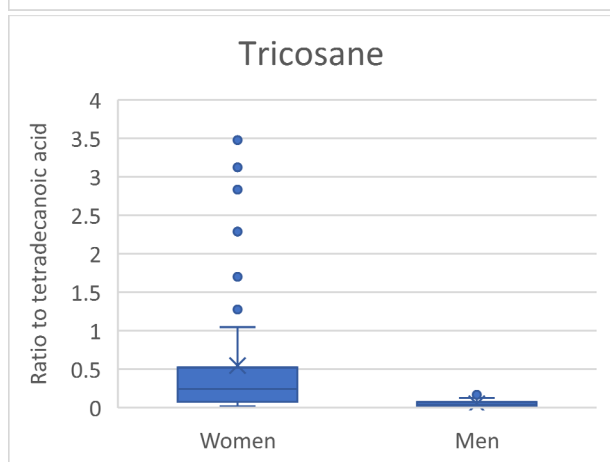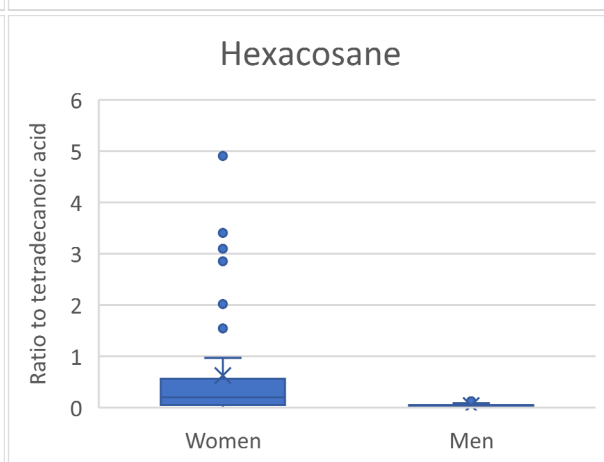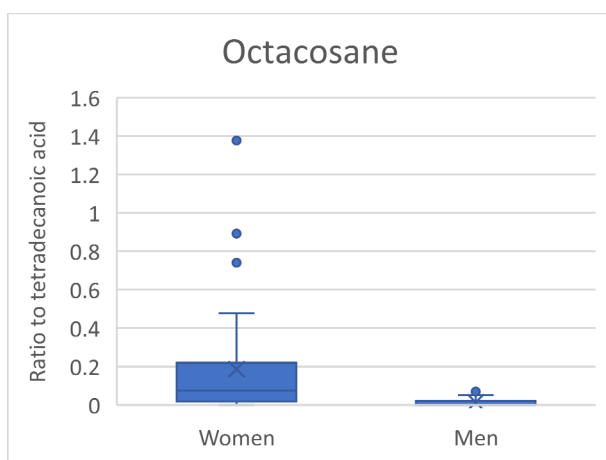

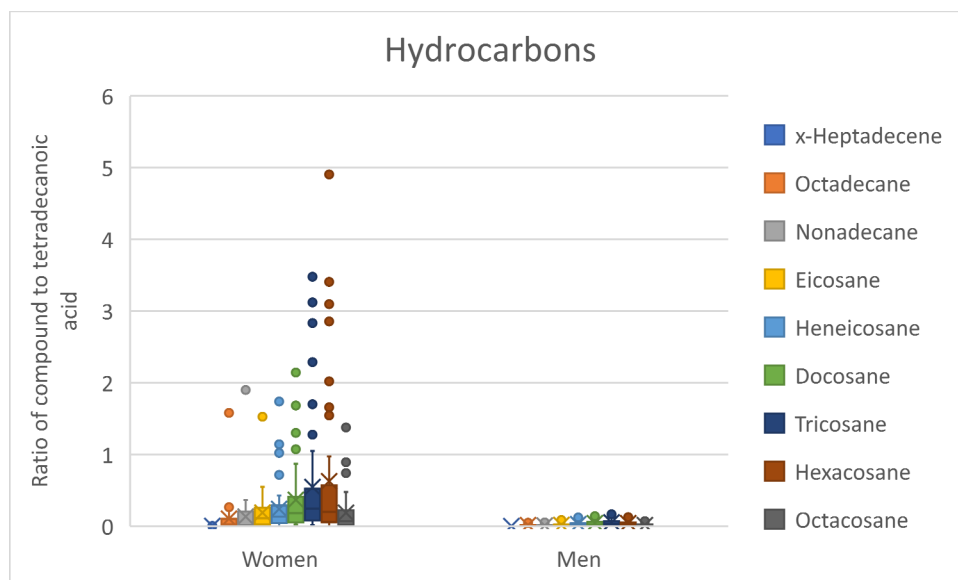

## Aldehydes

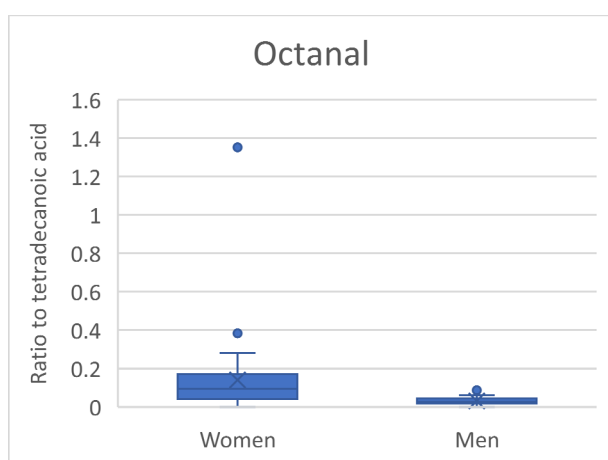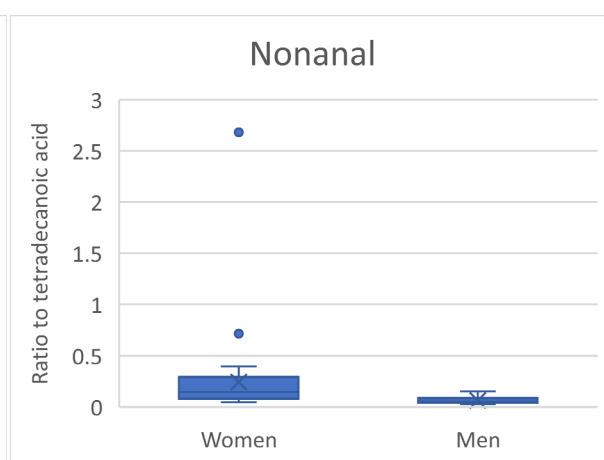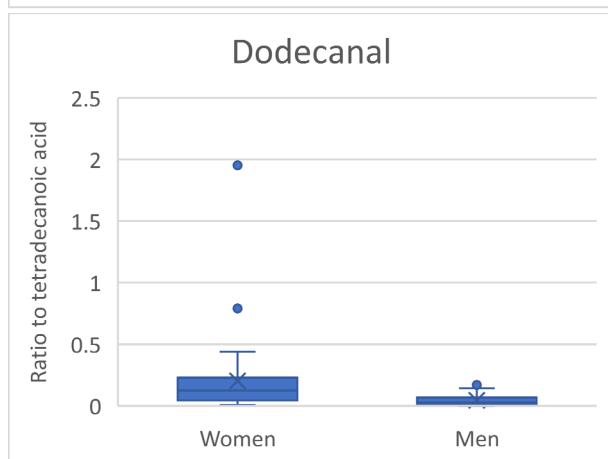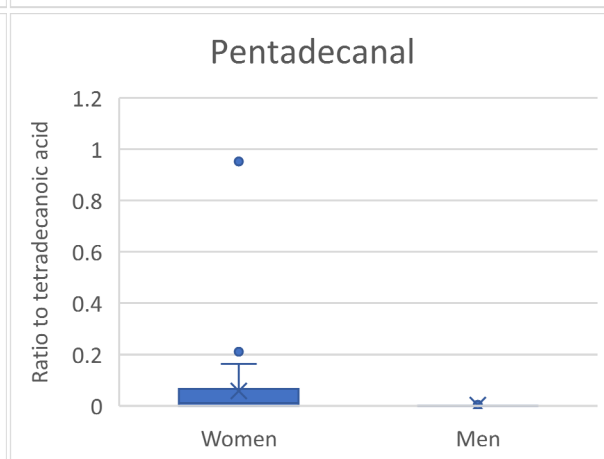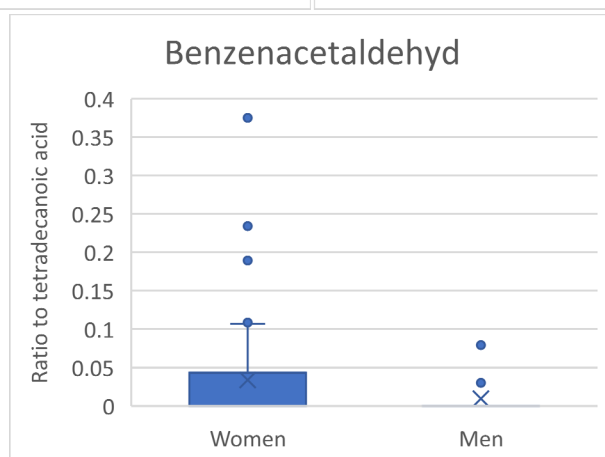



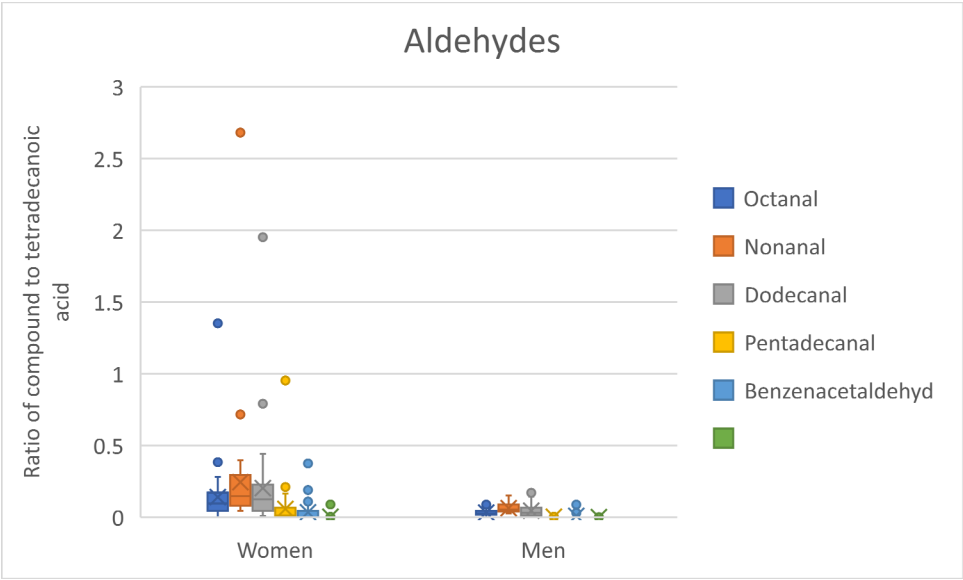

### Ketones

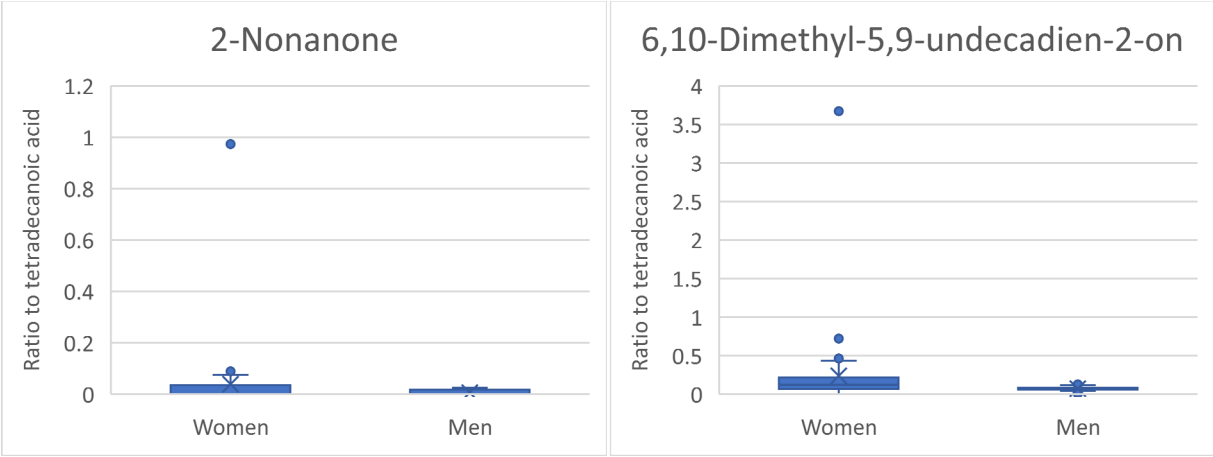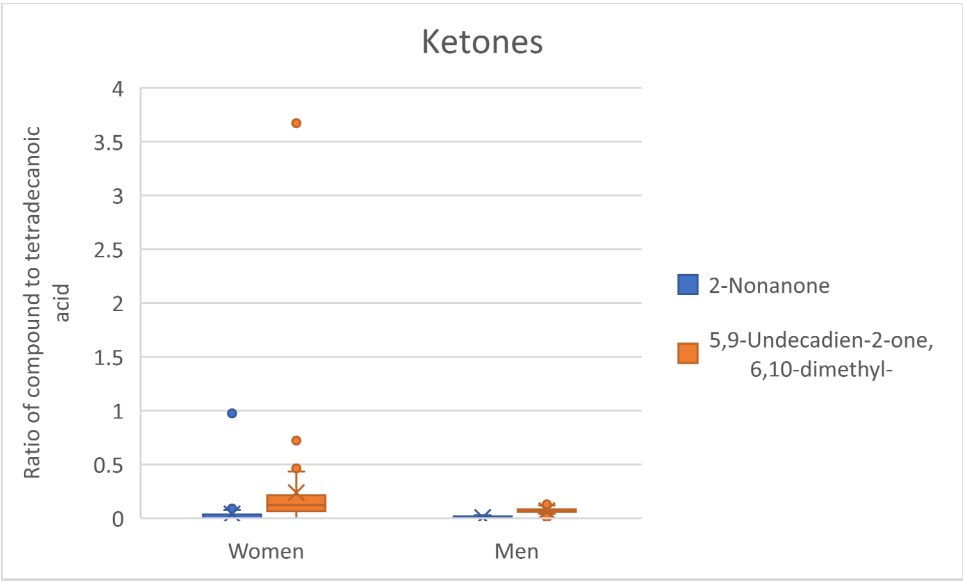

Alcohols

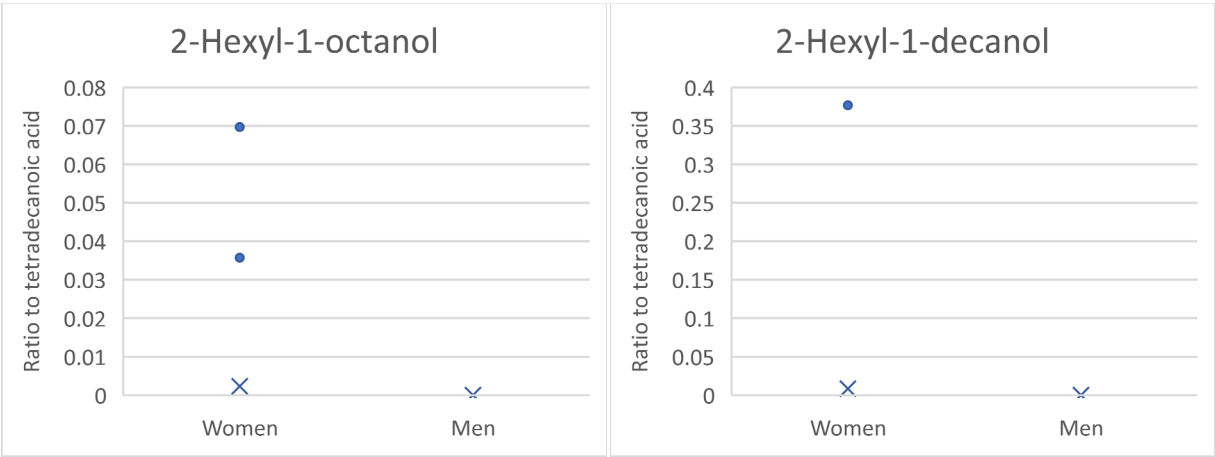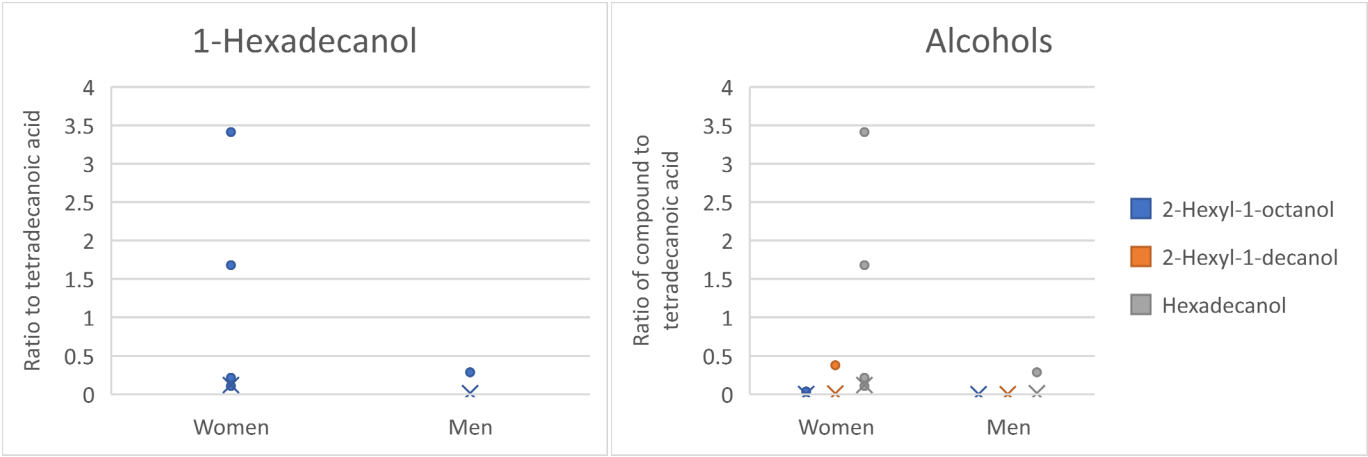

Esters

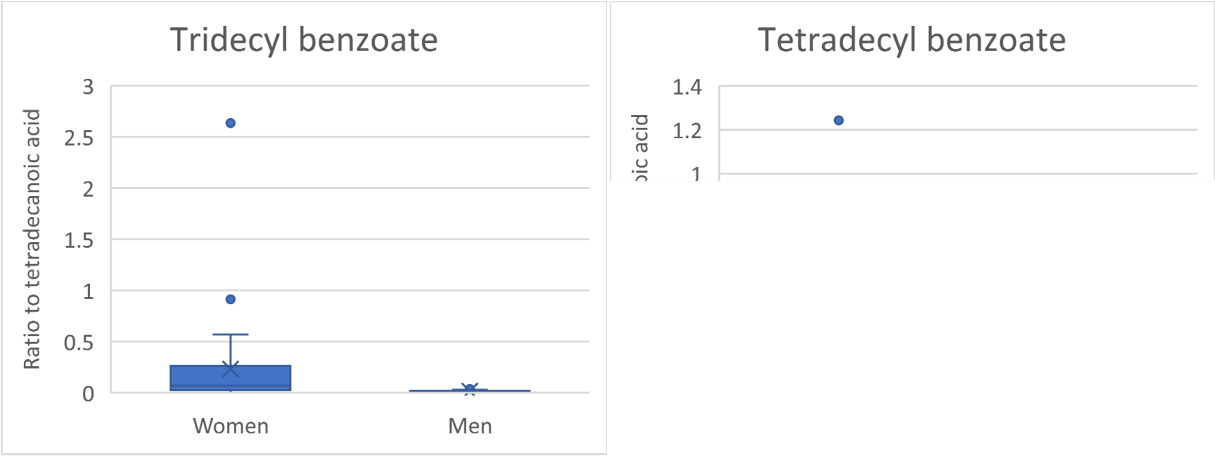

Supplement: s1 [file s1]
